# Supplementary material for: Direct observation of site-selective hydrogenation and spin-polarization in hydrogenated hexagonal boron nitride on Ni(111)
Source: Royal Society of Chemistry journal article supplement (doi:10.1039/c6nr06308j), 2017-01-01
Supplement: c6nr06308j1.pdf [file c6nr06308j1.pdf]

Supplementary materials

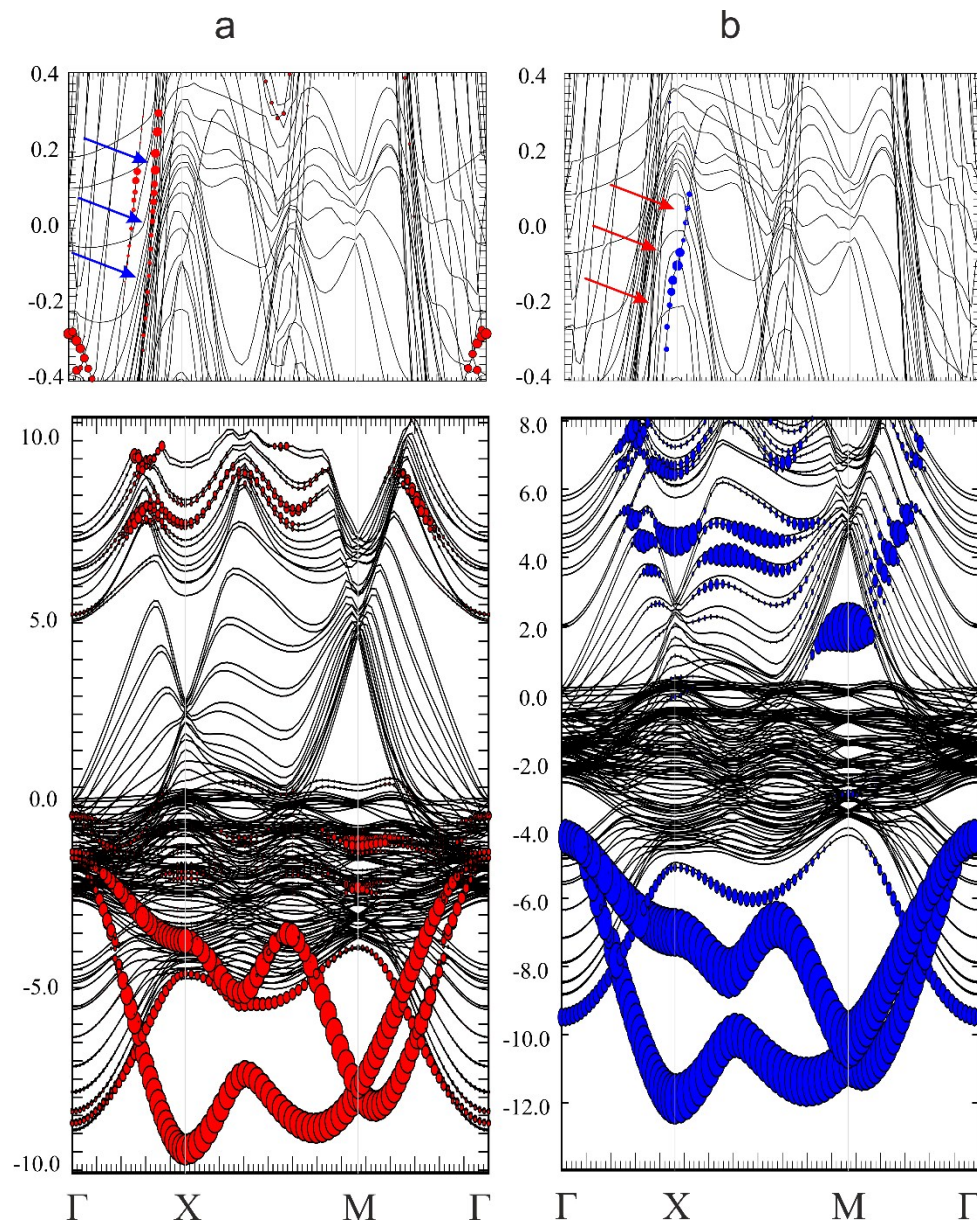

Figure S1: Band structures of *top*:N/*fcc*:BH and *top*:N/*fcc*:B configurations of *h*-BNH/Ni(111) (A) and *h*-BN/Ni(111) (B) heterostructures, respectively. On the top of the figures the details of band structures in the vicinities of the Fermi levels are presented with the same energy scales. On the bottom the wide energy regions are presented. The diameters of the dots reflect partial density of states of *h*-BNH (in red) and *h*-BN (in blue) fragments.

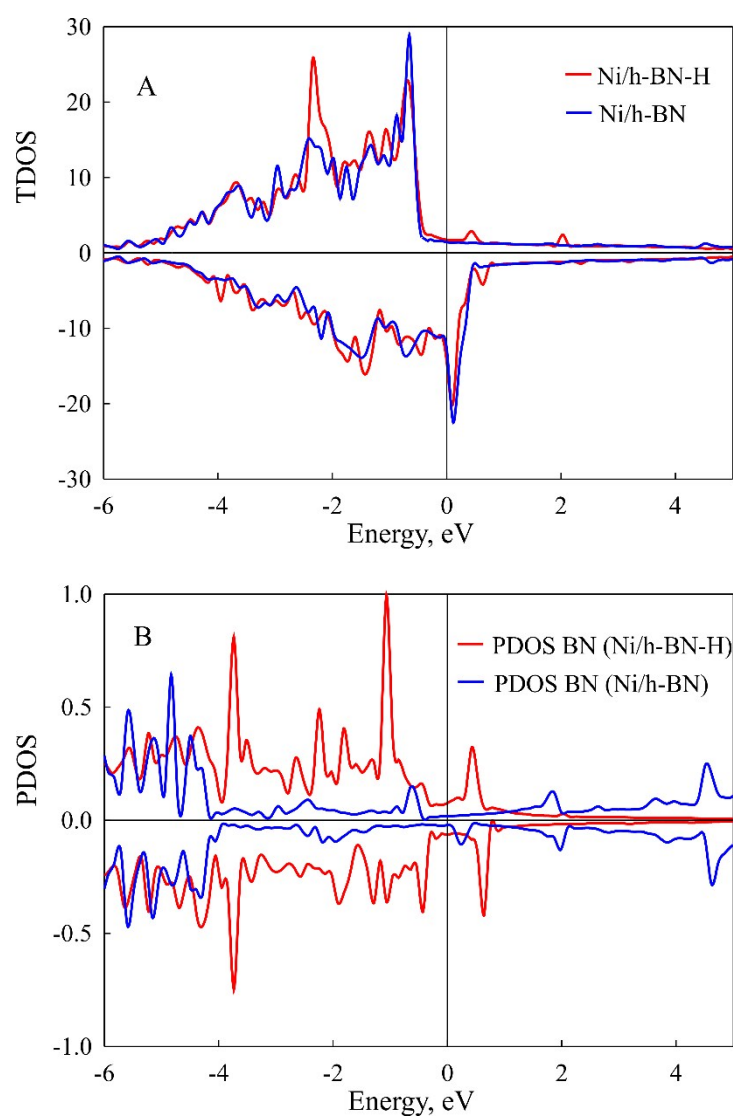

Figure S2: Total (A) and partial (B) density of states of  $top:N/fcc:BH$  and  $top:N/fcc:B$  configurations of  $h\text{-BNH}/\text{Ni}(111)$  (in red) and  $h\text{-BN}/\text{Ni}(111)$  (in blue) heterostructures, respectively.
